# Supplementary material
Source: Research Square preprint supplement (doi:10.21203/rs.3.rs-10237148/v1)
Supplement: Supplementary file 1 [file b7fad24125003e4aff734930.docx]

**Supporting Information**

**Robust and Controllable Production of Gelatin/PEGDA Hybrid Hydrogels using 3D-Printed Microfluidic Device**

Su-Bin Shin and Yoon-Ho Hwang*

Department of Polymer Engineering, Pukyong National University (PKNU), Nam-Gu, Busan 48513, Republic of Korea

*Corresponding Author E-mail: yoonho0806@pknu.ac.kr

**Keywords:** Hybrid hydrogel, Gelatin/PEGDA, 3D-prining, Microfluidics, Swelling


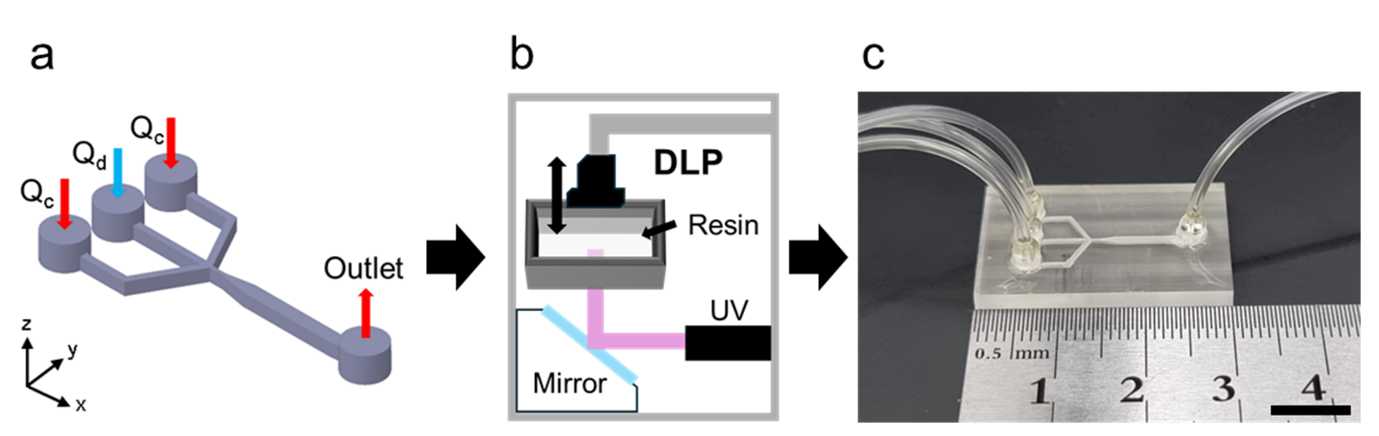


Fig. S1 The overall fabrication process of 3D-printed microfluidic device. (a) Computer-aided design (CAD) blueprint of microfluidic device with simple structur for the making Water-in-oil (W/O) droplets. (b) Digital Light Processing (DLP) type 3D-printer for preparation of droplet generator, Material: acrylate based resin, UV light wavelength: 385 nm, Thickness of one layer: 50 μm, Exposure time: 9.4 sec. (c) Photograph of the 3D-printed microfluidic device. Scale bar: 1 cm.


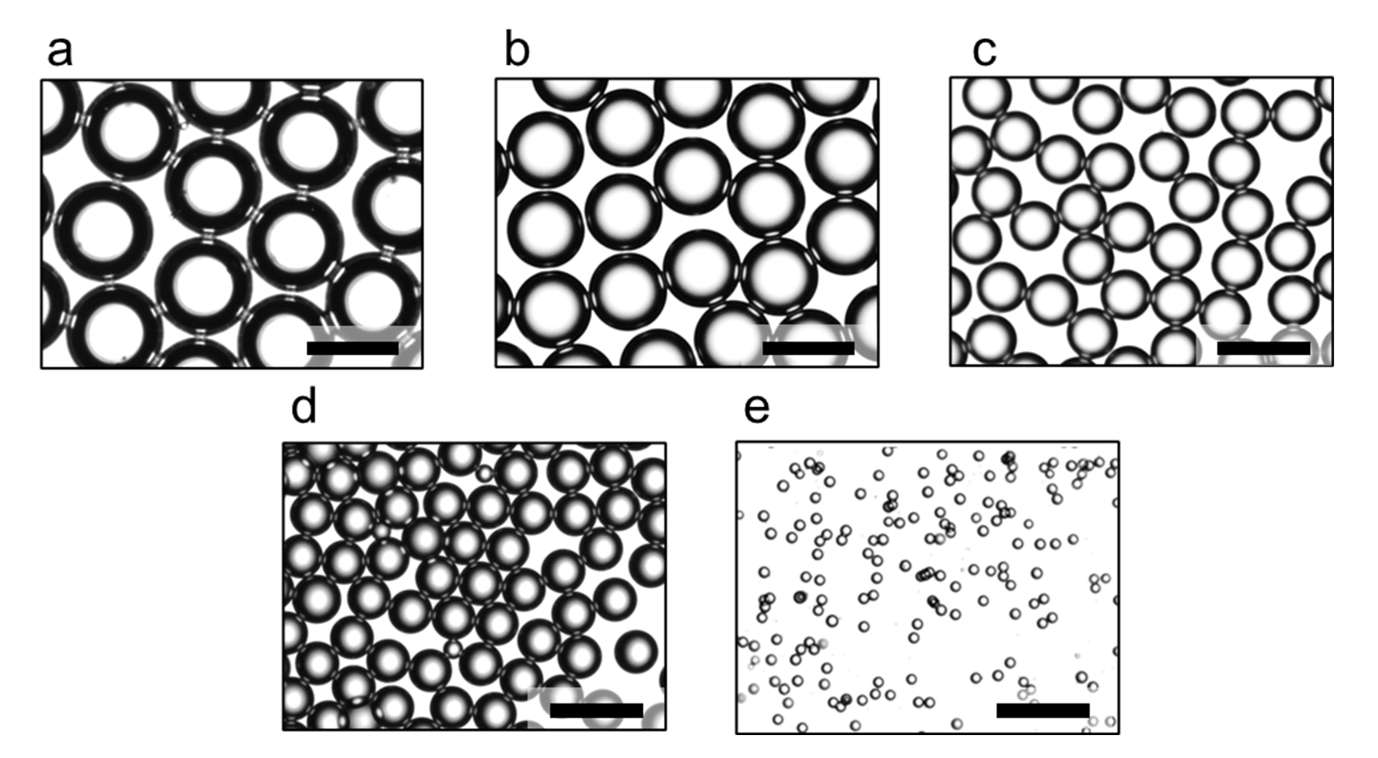


Fig. S2 Series of micrographs showing the monodisperse W/O emulsions from the 3D-printed device with an acute flow-focusing structure at different flow rate ratios (*Q*c/*Q*d). Dispersed phase: D.I water. Continuous phase: Mineral oil with 2 wt% Span 80. The average diameter of the droplets (Davg) are (a) 370.5 μm (CV = 2.19%), (b) 315.4 μm (CV = 0.95%), (c) 170.5 μm (CV = 1.58%), (d) 157.5 μm (CV = 3.24%), (e) 45.27 μm (CV = 4.03%), which are operated at constant *Q*c = 100 μl min-1, *Q*d =50 μl min-1, 30 μl min-1, 10 μl min-1, 5 μl min-1, 1 μl min-1, respectively.


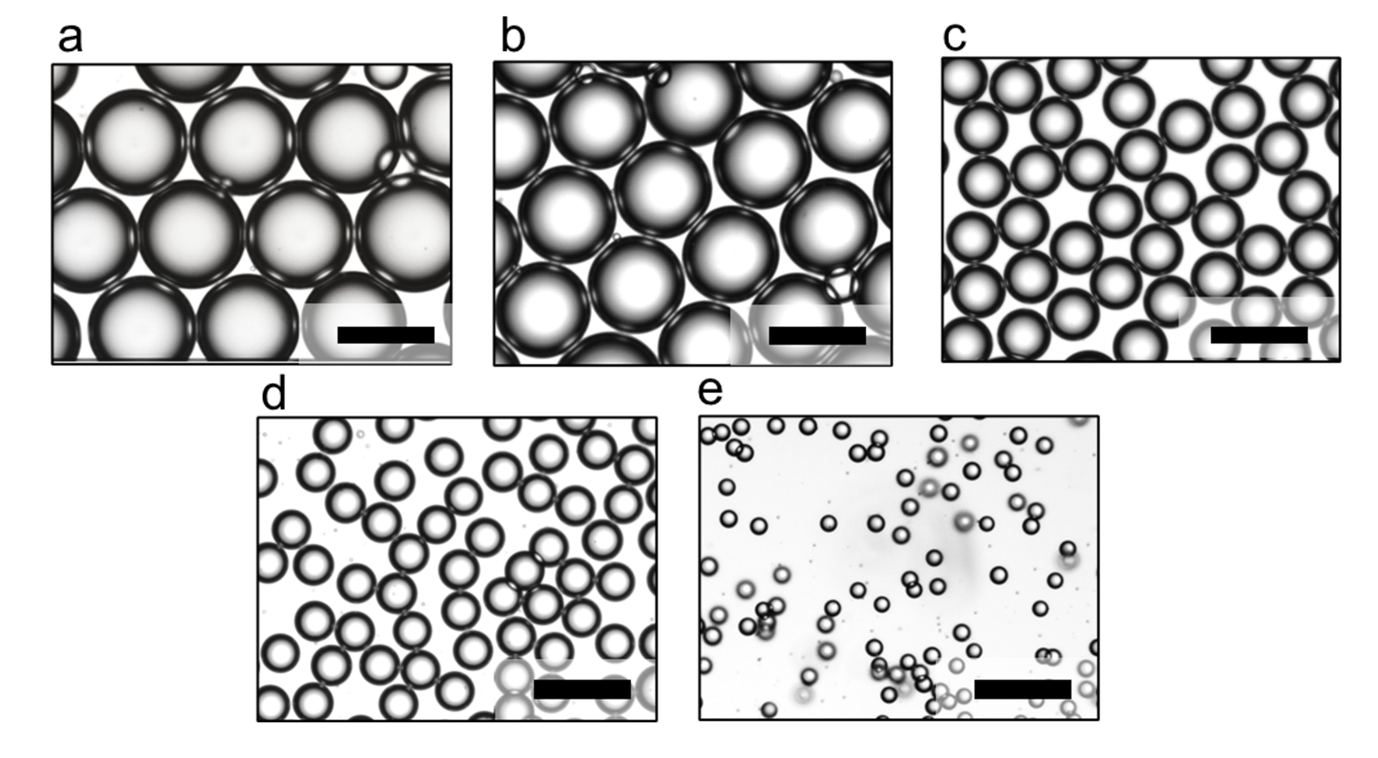


Fig. S3 Series of micrographs showing the monodisperse PEGDA droplets from the 3D-printed device with an acute flow-focusing structure at different flow rate ratios (*Q*c/*Q*d). Dispersed phase: 10 wt% PEGDA, 1 wt% Irgacure 2959 Aqueous solution. Continuous phase: Mineral oil with 2 wt% Span 80. The average diameter of the droplets (Davg) are (a) 369.09 μm (CV = 4.73%), (b) 332.3 μm (CV = 3.76%), (c) 162.5 μm (CV = 1.85%), (d) 145.1 μm (CV = 2.75%), (e) 61.2 μm (CV = 3.86%), which are operated at constant *Q*c = 100 μl min-1, *Q*d =50 μl min-1, 30 μl min-1, 10 μl min-1, 5 μl min-1, 1 μl min-1, respectively.


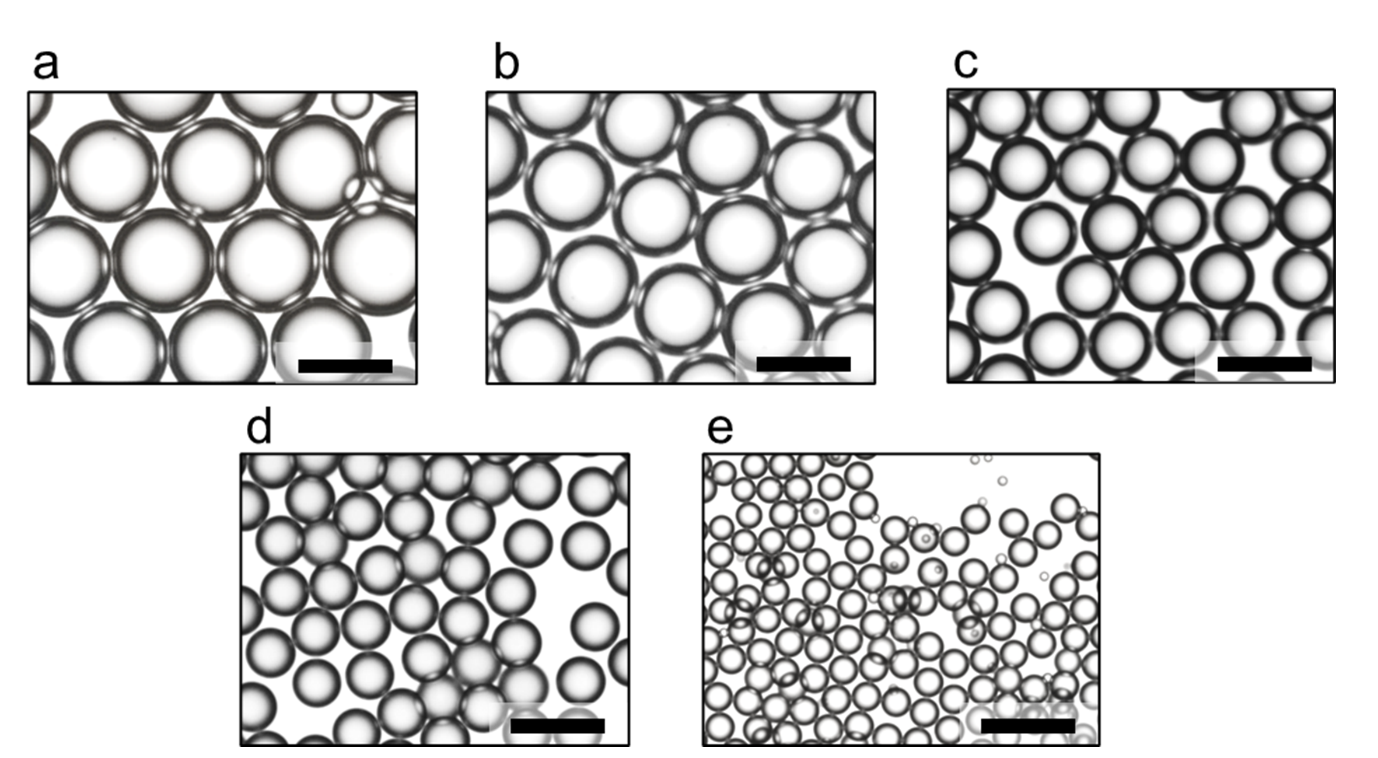


Fig. S4 Series of micrograph showing the monodisperse PEGDA/Gelatin hybrid droplets from the 3D-printed device with an acute flow-focusing structure at different flow rate ratios (*Q*c/*Q*d). Dispersed phase: 10 wt% PEGDA, 1 wt% Irgacure 2959 in 2 wt% gelatin aqeuous solution. Continuous phase: Mineral oil with 2 wt% Span80. The average diameter of the droplets (Davg) are (a) 339.5 μm (CV = 4.4%), (b) 293.3 μm (CV = 2.33%), (c) 196.1 μm (CV = 3.34%), (d) 161.5 μm (CV = 2.13%), (e) 57.3 μm (CV = 4.5%), which are operated at constant *Q*c = 100 μl min-1, *Q*d =50 μl min-1, 30 μl min-1, 10 μl min-1, 5 μl min-1, 1 μl min-1, respectively.
